# Supplementary material
Source: PubMed Central journal article supplement (PMC6851293)
Supplement: supp_RA118.002818_136547_3_supp_392824_pxsfzh.pdf [file supp_RA118.002818_136547_3_supp_392824_pxsfzh.pdf]

**A Glis3-CD133-Wnt signaling axis regulating self-renewal of adult murine pancreatic progenitor-like cells in colonies/organoids**

Tremblay, Jacob R., Lopez, Kasandra, Ku, Hsun Teresa

**LIST OF SUPPORTING INFORMATION:**

- A. Supplementary tables**
- B. Supplementary figures and legends**
- C. Reference**

**A. SUPPLEMENTARY TABLES:**

**Table S1.** Taqman probes used for conventional and microfluidic qRT-PCR analyses.

| Murine Gene                     | Assay ID from ABI |
|---------------------------------|-------------------|
| <i><math>\beta</math>-Actin</i> | Mm02619580_g1     |
| <i>Amylase 2A</i>               | Mm02342487_g1     |
| <i>Axin2</i>                    | Mm00443610_m1     |
| <i>CA2</i>                      | Mm00501572_m1     |
| <i>c-myc</i>                    | Mm00487803_m1     |
| <i>Ctnnb1</i>                   | Mm00483033_m1     |
| <i>Elastase-1</i>               | Mm00712898_m1     |
| <i>Glis3</i>                    | Mm00615386_m1     |
| <i>Glucagon</i>                 | Mm00801712_m1     |
| <i>Hnf1b</i>                    | Mm00447459_m1     |
| <i>Insulin II</i>               | Mm 00731595_gH    |
| <i>Krt7</i>                     | Mm00466676_m1     |
| <i>Krt19</i>                    | Mm00492980_m1     |
| <i>Lgr5</i>                     | Mm00438890_m1     |
| <i>Lrp6</i>                     | Mm00999795_m1     |
| <i>Mucin-1</i>                  | Mm00449604_m1     |
| <i>Notch2</i>                   | Mm00803077_m1     |

|                   |               |
|-------------------|---------------|
| <i>Prominin-1</i> | Mm00477115_m1 |
| <i>Sox9</i>       | Mm00448840_m1 |

**Table S2.** Antibodies used for Western blot and co-immunoprecipitation analyses.

| <b>Primary Antibodies</b>                           |                |                              |                                        |                                      |
|-----------------------------------------------------|----------------|------------------------------|----------------------------------------|--------------------------------------|
| <b>Antigen</b>                                      | <b>Species</b> | <b>Source</b>                | <b>Clone;<br/>Catalogue<br/>Number</b> | <b>Dilution</b>                      |
| $\beta$ -Actin                                      | Mouse          | GenScript                    | 2D1D10;<br>A00702                      | 1:10,000                             |
| $\beta$ -Catenin                                    | Rabbit         | Millipore                    | Polyclonal;<br>06-734                  | 1:2,000                              |
| $\beta$ -Catenin                                    | Rabbit         | Abcam                        | E247;<br>ab32572                       | 1:3,000                              |
| Non-phospho<br>(Ser33/37/Thr41)<br>$\beta$ -Catenin | Rabbit         | Cell Signaling<br>Technology | D13A1;<br>8814S                        | 1:1,000                              |
| p-Beta-catenin<br>(Tyr142)                          | Rabbit         | Abcam                        | Polyclonal;<br>ab27798                 | 1:500                                |
| p-Beta-catenin<br>(Tyr654)                          | Rabbit         | Abcam                        | Polyclonal;<br>ab59430                 | 1:500                                |
| AKT                                                 | Rabbit         | Cell Signaling<br>Technology | C67E7; 4691S                           | 1:1,000                              |
| p-AKT (Ser473)                                      | Rabbit         | Cell Signaling<br>Technology | Polyclonal;<br>9271 S                  | 1:500                                |
| E-Cadherin                                          | Mouse          | Cell Signaling<br>Technology | 4A2;<br>14472                          | 1:1,000<br>(WB)<br>/1:100<br>(Co-IP) |
| Lgr5                                                | Rabbit         | Abcam                        | EPR3065Y;<br>ab75850                   | 1:1,000                              |
| Lrp6                                                | Rabbit         | Cell Signaling               | 3395S                                  | 1:1,000                              |
| p-Lrp6 (Ser1490)                                    | Rabbit         | Cell Signaling               | 2568S                                  | 1:1,000                              |
| Prominin-1<br>(CD133)                               | Rat            | Millipore                    | 13A4;<br>MAB4310                       | 1:1,000                              |

|                             |                           |                           |                                        |                 |
|-----------------------------|---------------------------|---------------------------|----------------------------------------|-----------------|
| Stat3                       | Mouse                     | Cell Signaling            | 9139                                   | 1:1,000         |
| p-Stat3(Tyr705)             | Rabbit                    | Cell Signaling            | 9131S                                  | 1:1,000         |
| <b>Secondary Antibodies</b> |                           |                           |                                        |                 |
| <b>Antigen</b>              | <b>Conjugation</b>        | <b>Source</b>             | <b>Clone;<br/>Catalogue<br/>Number</b> | <b>Dilution</b> |
| Mouse                       | Horseradish<br>Peroxidase | Jackson<br>ImmunoResearch | Ployclonal;<br>715-035-150             | 1:10,000        |
| Rabbit                      | Horseradish<br>Peroxidase | Jackson<br>ImmunoResearch | Polyclonal;<br>711-035-152             | 1:10,000        |
| Rat                         | Horseradish<br>Peroxidase | Jackson<br>ImmunoResearch | Polyclonal;<br>712-036-150             | 1:10,000        |

C. SUPPORTING FIGURES AND LEGENDS

Figure S1

Tremblay et al. 2019

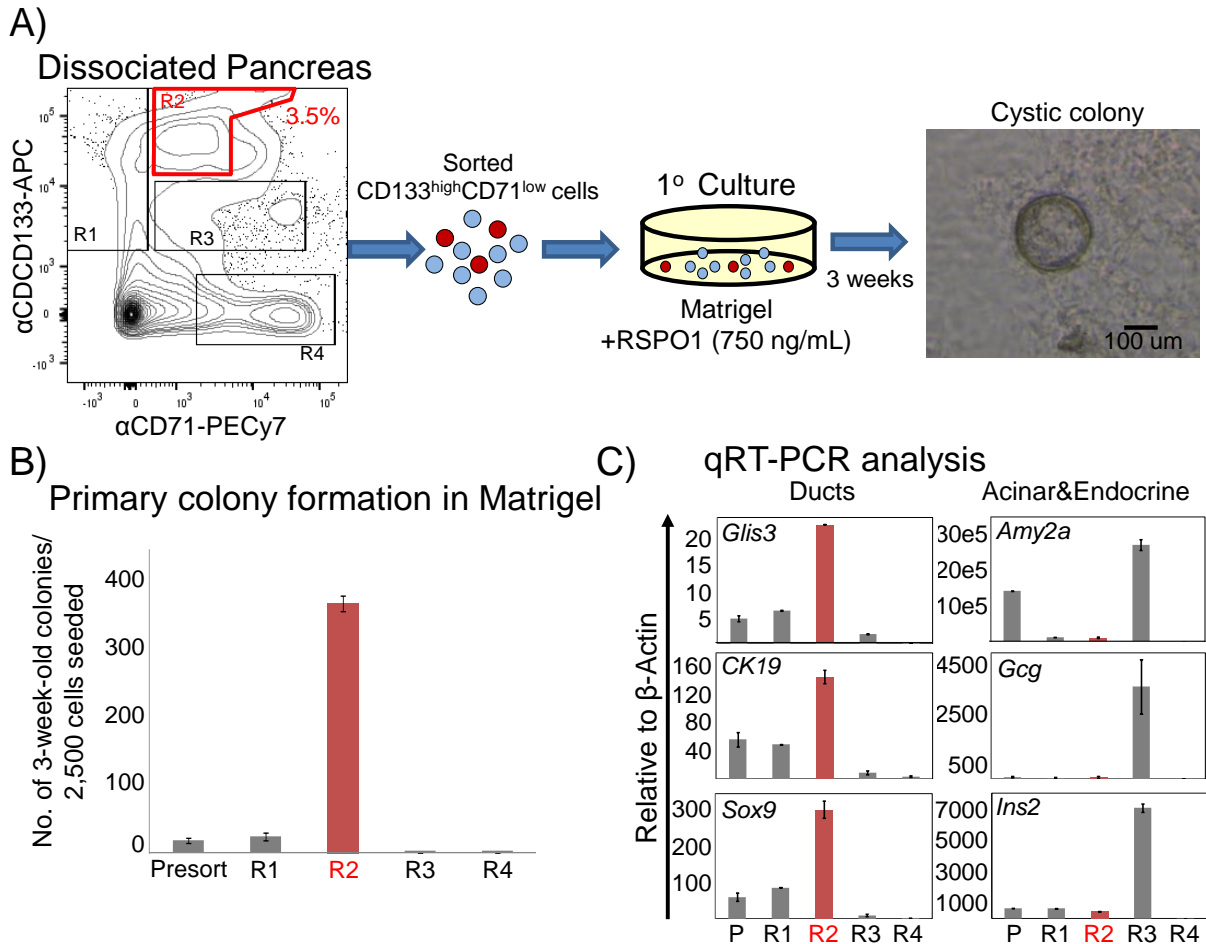

**Figure S1. Sorted pancreatic  $CD133^{high}CD71^{low}$  cells express *Glis3* and ductal cell markers and are enriched for PCFUs that form colonies in our standard colony assay containing Matrigel.** A) Sorting gates and plating scheme of dissociated pancreatic cells isolated from adult (8-12-week-old) mice. Colonies that formed were generally referred to as cystic colonies. B) Colony frequency was highest in R2 ( $CD133^{high}CD71^{low}$ ) cells, compared to other sorted cell populations. Data represent mean  $\pm$  s.d. of 4 technical replicates from one experiment of a total of 3 experiments showing similar trends. C) Representative conventional qRT-PCR analysis of freshly sorted cells for various lineage markers. Cells in

region (R) 1 and R2 expressed higher levels of ductal markers, while R3 cells expressed higher endocrine and acinar markers. The presort (P) cells were used as controls. Data represent mean  $\pm$  s.d. of 3 technical replicates from one experiment of a total of 3 experiments showing similar trends.

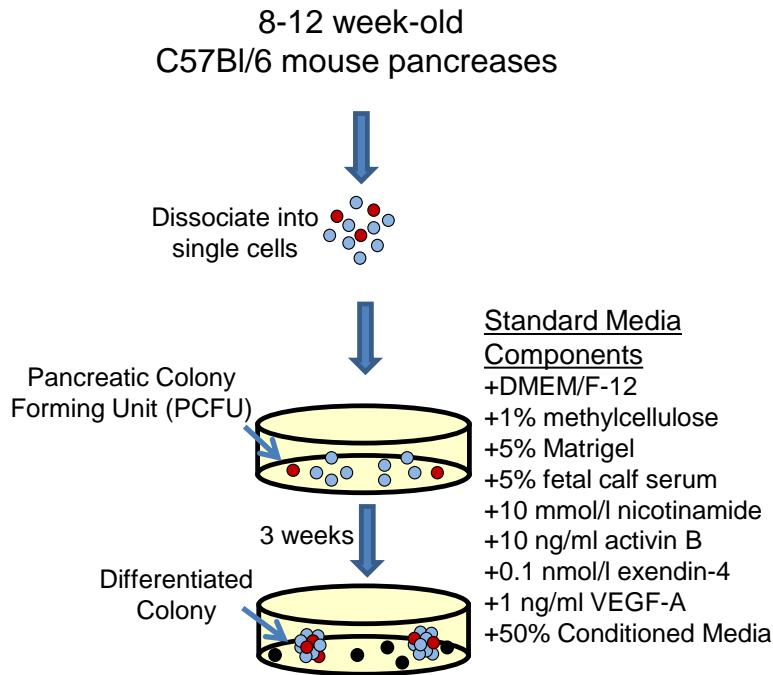

**Figure S2. An *in vitro* quantitative assay for measuring pancreatic colony-forming units (PCFUs) isolated from adult murine pancreas.** Single cell suspension was obtained from the whole pancreas by enzymic dissociation, labeled with antibodies against cell surface markers, and fractionated by a fluorescence-activated cell sorter to obtain CD133<sup>high</sup>CD71<sup>low</sup> cells, which are enriched for murine adult PCFUs (1). To obtain cystic colonies, sorted cells were plated into a “standard” colony assay in semisolid medium containing DMEM/F12, 1% (w/v) methylcellulose, 5% (v/v) Matrigel, 50% conditioned medium from murine embryonic stem cell-derived pancreatic-like cell culture, 10 mM nicotinamide, 0.1 nM exendin-4, 10 ng/mL Activin B and 10 ng/mL VEGF-A. To obtain endocrine/acinar colonies, 100 ug/mL laminin hydrogel was used to replace Matrigel in the standard colony assay. The semisolid medium restricted the movement and aggregation of PCFUs. Individual PCFUs gave rise to colonies, which were then numerated and analyzed by qRT-PCR and other techniques.

Figure S3

Tremblay et al. 2019

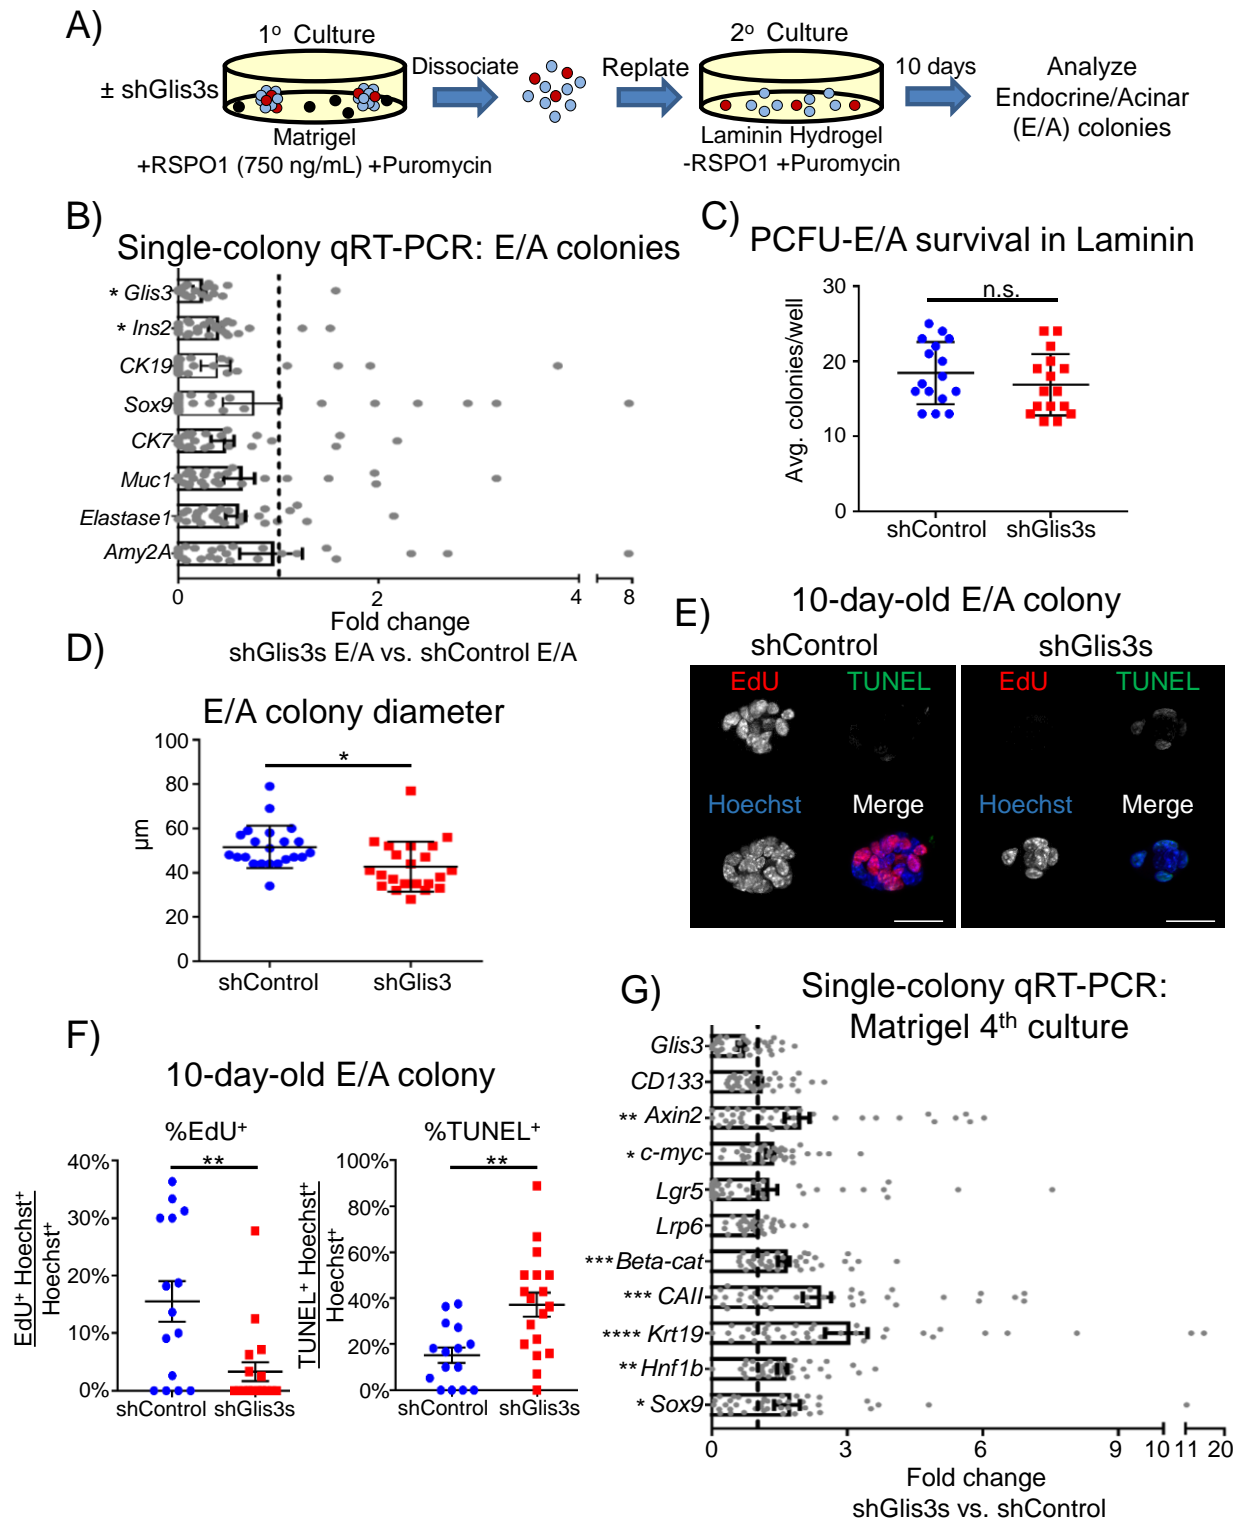



**Figure S3. Validation of the effects of lentiviral vectors carrying a pool of 5 short hairpin (sh) RNA against Glis3 in PCFU-derived colonies.** A) Experimental scheme for generating “Endocrine/Aciniari (E/A)” colonies. Freshly sorted pancreatic CD133<sup>high</sup>CD71<sup>low</sup> cells, which enrich for PCFUs, were transduced with shGlis3s or shControl overnight, washed, and plated into Matrigel-containing culture with exogenous RSPO1 and puromycin for 3 weeks. Cystic colonies were collected, pooled, dissociated into single cell suspension and re-plated into laminin hydrogel-containing colony assay (without Matrigel and RSPO1) but with puromycin. E/A colonies form after 10 days in the laminin hydrogel culture. B) Microfluidic qRT-PCR analyses showed that *Glis3* and *Ins2* gene expression in individual 10-day-old E/A colonies were reduced by Glis3 knockdown. Data represent mean  $\pm$  s.e.m. of a total of 25 colonies gathered from 3 independent experiments. \*P-value<0.05. C) Glis3 knockdown did not affect the number of E/A colonies formed 10-days post-plating, suggesting that Glis3 was not required for the survival of PCFUs that gave rise to E/A colonies. Data are from 5 pooled biological samples run in 3 independent experiments with 4 technical replicates each and are represent as mean  $\pm$  s.e.m. D) Glis3 knockdown decreased E/A colony diameter, suggesting that Glis3 was required for the growth of cells in E/A colonies. Data represent mean  $\pm$  s.e.m. of a total of 25 colonies gathered from 3 independent experiments. E) Representative images for whole-mount immunostaining of 10-day-old E/A colonies that received shControl or shGlis3s and stained with makers of proliferation (EdU) and apoptosis (TUNEL). Hoechst dye was used to stain the nuclei. Glis3 knockdown caused reduced proliferation and enhanced apoptosis of cells growing in the E/A colonies. F) Quantification of EdU<sup>+</sup>Hoechst<sup>+</sup> or TUNEL<sup>+</sup>Hoescht<sup>+</sup> nuclei. Data represent mean  $\pm$  s.e.m. from 15 E/A colonies treated with shControl and 18 E/A colonies treated with shGlis3s from 2 independent experiments. G) Microfluidic qRT-PCR analyses showed that the 4<sup>th</sup> generation of cells in long-term Matrigel and RSPO1-containing culture initiated with Glis3 knockdown have increased expression of ductal and Wnt genes. Data represented as means  $\pm$  s.e.m. from 41 colonies collected from 3 independent experiments.

Figure S4 Tremblay et al. 2019

| CD133-KD decreased genes: top 10 upstream complexes |         |             |                      |
|-----------------------------------------------------|---------|-------------|----------------------|
| Upstream Complexes                                  | z-score | p-Value     | Predicted Activation |
| PDGF BB                                             | -4.365  | 2.22E-17    | Inhibited            |
| PI3K (complex)                                      | -2.862  | 2.05E-09    | Inhibited            |
| Stat3-Stat3                                         | -2.607  | 9.06E-09    | Inhibited            |
| NFkB (complex)                                      | -3.316  | 9.69E-08    | Inhibited            |
| STAT1/3/5 dimer                                     | -2.219  | 0.00000017  | Inhibited            |
| Cg                                                  | -3.322  | 0.000000338 | Inhibited            |
| FSH                                                 | -2.355  | 0.00000628  | Inhibited            |
| Immunoglobulin                                      | -2.208  | 0.00000714  | Inhibited            |
| Ap1                                                 | -2.19   | 0.0000982   | Inhibited            |
| LDL                                                 | -2.208  | 0.000174    | Inhibited            |

**Figure S4. Genome-wide gene expression and bioinformatics analyses reveal that CD133 knockdown is predicted to inhibit PI3K/AKT and other signaling in colonies.** A list of down-regulated protein complexes affected by CD133 knockdown. Results are from 2 independent experiments consisting of 5 pooled pancreases each.

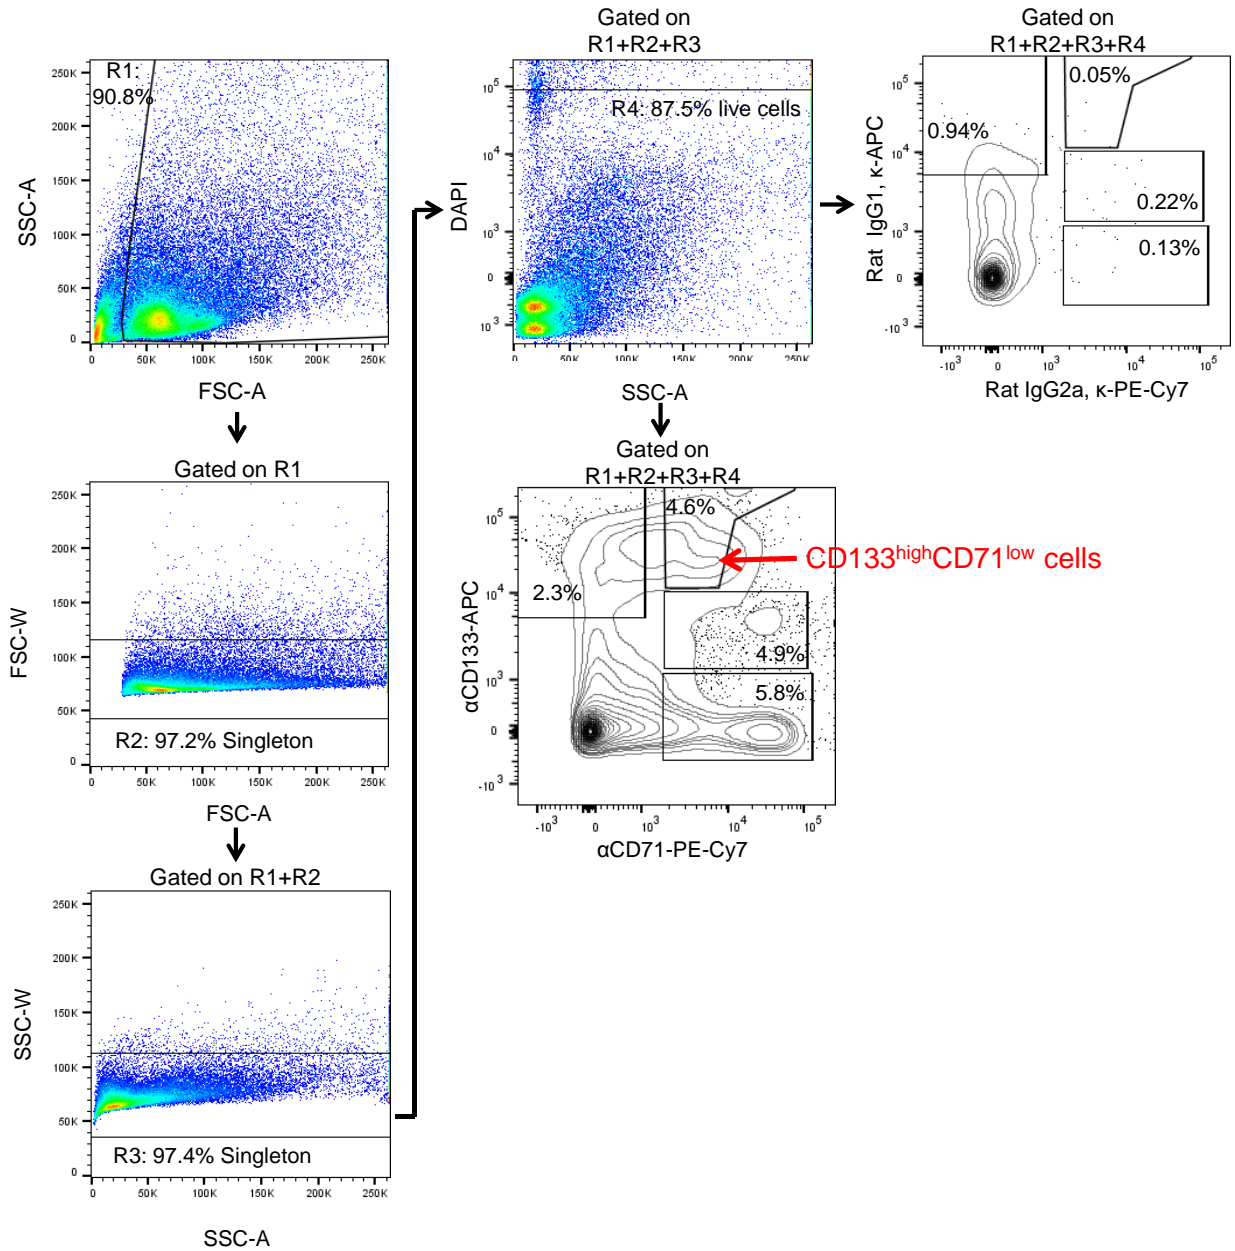

**Figure S5. Representative gates used in flow cytometry for sorting cells.** Pancreatic CD133<sup>high</sup>CD71<sup>low</sup> cells, a population that was previously determined to be enriched for PCFUs (1), were sorted after gating with forward scatter-area (FSC-A; indicative of cell size), side scatter-area (SSC-A; indicative of granularity), forward scatter-width (FSC-W; a high value of which is indicative of cell doublets), side scatter-width (SSC-W; a high value of which is indicative of cell doublets), and DAPI negative (indicative

of live cells). Cells stained with isotype control antibodies were used to indicate specificity of the CD133 and CD71 staining.

#### **D. REFERENCES**

1. Jin L, Gao D, Feng T, Tremblay JR, Ghazalli N, Luo A, Rawson J, Quijano JC, Chai J, Wedeken L, Hsu J, LeBon J, Walker S, Shih HP, Mahdavi A, Tirrell DA, Riggs AD, Ku HT: Cells with surface expression of CD133(high)CD71(low) are enriched for tripotent colony-forming progenitor cells in the adult murine pancreas. *Stem Cell Res* 2016;16:40-53
